# Supplementary material for: 15-PGDH inhibition activates the splenic niche to promote hematopoietic regeneration
Source: JCI journal article supplement (doi:10.1172/jci.insight.143658), 2021-02-28
Supplement: sd1 [file 1]

## **15-PGDH Inhibition Activates the Splenic Niche to Promote Hematopoietic Regeneration**

Julianne N.P. Smith<sup>1</sup>, Dawn M. Dawson<sup>1</sup>, Kelsey F. Christo<sup>1</sup>, Alvin P. Jogasuria<sup>1</sup>, Mark J. Cameron<sup>1</sup>, Monika I. Antczak<sup>3</sup>, Joseph M. Ready<sup>3,4</sup>, Stanton L. Gerson<sup>1,2</sup>, Sanford D. Markowitz<sup>1,2</sup>, Amar B. Desai<sup>1</sup>

### **SUPPLEMENTAL MATERIAL**

Supplemental Figures: 7

Supplemental Tables: 0

Supplemental References: 0

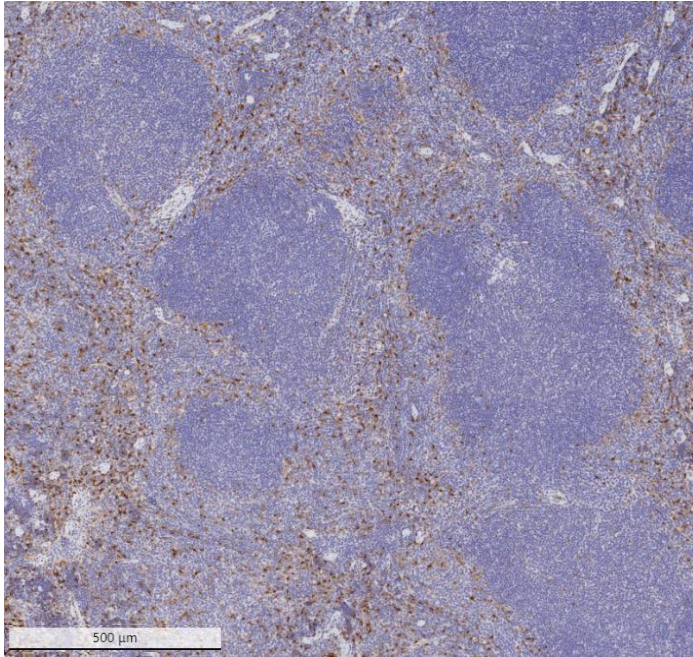

**Supplementary Figure 1. 15-PGDH is expressed in the splenic red pulp.** Representative image of 15-PGDH staining in the murine spleen at 5X magnification. Scale bar represents 500um. Two independent experiments of N = 2 mice per experiment.

### WBCs (K cells/uL)

|                         | <u>D7</u> | <u>D12</u> | <u>D16</u> | <u>D20</u> |
|-------------------------|-----------|------------|------------|------------|
| Intact- Vehicle         | 0.453     | 0.947      | 1.765      | 2.460      |
| Intact- PGDHi           | 0.723     | 1.492      | 2.785      | 3.396      |
| Splenectomized- Vehicle | 0.556     | 1.209      | 3.007      | 2.620      |
| Splenectomized- PGDHi   | 0.548     | 1.212      | 2.805      | 2.855      |

### NE (K cells/uL)

|                         | <u>D7</u> | <u>D12</u> | <u>D16</u> | <u>D20</u> |
|-------------------------|-----------|------------|------------|------------|
| Intact- Vehicle         | 0.148     | 0.456      | 0.589      | 0.754      |
| Intact- PGDHi           | 0.260     | 0.935      | 1.129      | 1.170      |
| Splenectomized- Vehicle | 0.215     | 0.432      | 0.849      | 0.757      |
| Splenectomized- PGDHi   | 0.265     | 0.467      | 0.869      | 0.874      |

### PLT (K cells/uL)

|                         | <u>D7</u> | <u>D12</u> | <u>D16</u> | <u>D20</u> |
|-------------------------|-----------|------------|------------|------------|
| Intact- Vehicle         | 117       | 312        | 307        | 358        |
| Intact- PGDHi           | 170       | 390        | 414        | 443        |
| Splenectomized- Vehicle | 135       | 312        | 442        | 439        |
| Splenectomized- PGDHi   | 190       | 344        | 453        | 496        |

**Supplementary Figure 2. Mean peripheral blood cell values in splenectomized versus intact Vehicle- and PGDHi-treated mice.** Complete blood counts were measured at days 7, 12, 16, and 20 post-bone marrow transplant. N = 12-15 mice/group. Data represent the mean values for indicated cell types and timepoints.

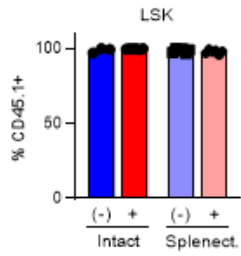

**Supplementary Figure 3. LSKs in splenectomized and intact transplant-recipients are donor-derived.** Quantification of percent CD45.1+ Lineage- Sca1+ c-Kit+ (LSK) cells in the marrow of intact and splenectomized, treated with Veh and PGDHi, 20 days post-transplant. N = 3-6 mice/group. Error bars represent SEM.

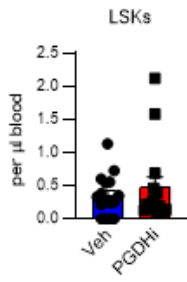

**Supplementary Figure 4. PGDHi does not mobilize HSPCs.** Quantification of Lineage- Sca1+ c-Kit+ cells per ul peripheral blood derived from mice treated 5 days with Veh or PGDHi. N = 15-16 mice/group. Error bars represent SEM.

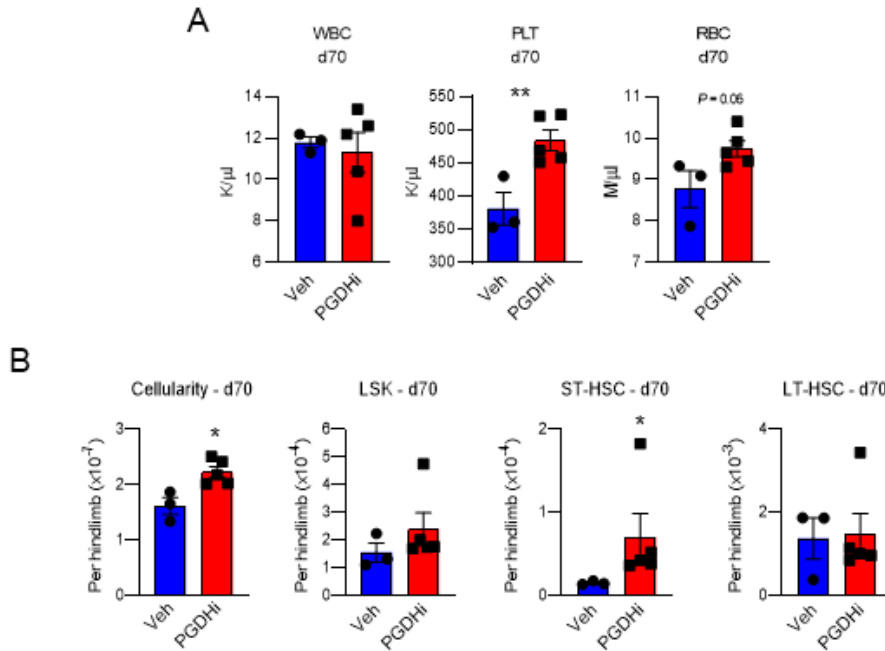

**Supplementary Figure 5. PGDHi confers sustained BM engraftment capacity to transplanted splenocytes.** **A.** Complete blood count analysis of white blood cells (WBCs), platelets (PLT), and red blood cells (RBC) in recipient mice 70 days post-transplantation of splenocytes from vehicle (Veh)- and PGDHi-treated donors. **B.** Quantification of BM cellularity, Lin<sup>-</sup> Sca1<sup>+</sup> cKit<sup>+</sup> (LSK), CD48<sup>-</sup> CD150<sup>-</sup> LSK (ST-HSC), and CD48<sup>-</sup> CD150<sup>+</sup> LSK (LT-HSC) per hindlimb of recipient mice. N = 3-5 mice/group. Error bars represent SEM. Statistical analysis by Student's t-test.

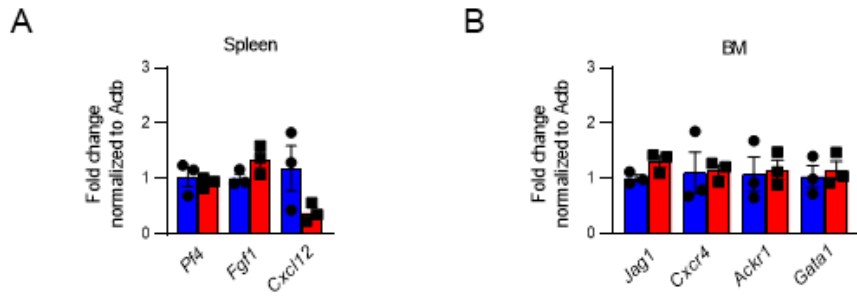

**Supplementary Figure 6. Expression of additional hematopoietic niche-related genes in the BM and spleen of 5 day PGDHi-treated mice.** Relative expression of the indicated genes in lymphoid-depleted cells from the spleen (**A**) and BM (**B**) of vehicle (Veh; blue) and PGDHi (red) mice. N = 3 mice/group. Error bars represent SEM.

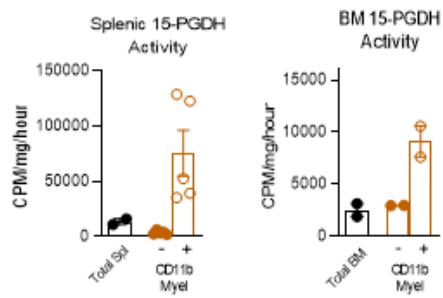

**Supplementary Figure 7. Quantification of 15-PGDH enzymatic activity in splenic and bone marrow myeloid cells.** Counts expressed as counts per minute (CPM) per mg total protein in total, CD11b- and CD11b+ cells from the Spleen and BM of mice. N = 5 mice for splenic analysis and 2 mice for BM analysis. Error bars represent SEM.
